# Supplementary material
Source: MDPI journal article supplement (https://www.mdpi.com/2311-5637/10/2/102)
Supplement: s1 [file s1]

# Supporting information

**Table S1:** Composition of the liquid cultivation medium (Doll et al., 2018) used for precultures in anaerobic shaken bottles and batch processes in stirred-tank bioreactors.

| Component                                            | Formula                                                              | Concentration in Stock solution, g L <sup>-1</sup> |
|------------------------------------------------------|----------------------------------------------------------------------|----------------------------------------------------|
| <b>Mineral solution</b>                              |                                                                      | <b>33.3x</b>                                       |
| Ammoniumchloride                                     | NH <sub>4</sub> Cl                                                   | 100                                                |
| Sodium chloride                                      | NaCl                                                                 | 80                                                 |
| Potassium chloride                                   | KCl                                                                  | 10                                                 |
| Potassium dihydrogen phosphate                       | KH <sub>2</sub> PO <sub>4</sub>                                      | 10                                                 |
| Magnesium sulfate                                    | MgSO <sub>4</sub>                                                    | 20                                                 |
| Calcium chloride                                     | CaCl <sub>2</sub>                                                    | 4                                                  |
| <b>Vitamin solution</b>                              |                                                                      | <b>100x</b>                                        |
| Pyridoxine                                           | C <sub>8</sub> H <sub>11</sub> NO <sub>3</sub>                       | 0.01                                               |
| Thiamine                                             | C <sub>12</sub> H <sub>17</sub> ClN <sub>4</sub> OS                  | 0.005                                              |
| Riboflavine                                          | C <sub>17</sub> H <sub>20</sub> N <sub>4</sub> O <sub>6</sub>        | 0.005                                              |
| Calcium pantothenate                                 | Ca(C <sub>9</sub> H <sub>16</sub> NO <sub>5</sub> ) <sub>2</sub>     | 0.005                                              |
| Liponic acid                                         | C <sub>8</sub> H <sub>14</sub> O <sub>2</sub> S <sub>2</sub>         | 0.005                                              |
| Para amino benzoic acid                              | C <sub>7</sub> H <sub>7</sub> NO <sub>2</sub>                        | 0.005                                              |
| Nicotinic acid                                       | C <sub>6</sub> H <sub>5</sub> NO <sub>2</sub>                        | 0.005                                              |
| Vitamin B12                                          | C <sub>72</sub> H <sub>100</sub> CoN <sub>18</sub> O <sub>17</sub> P | 0.005                                              |
| D-biotine                                            | C <sub>10</sub> H <sub>16</sub> N <sub>2</sub> O <sub>3</sub> S      | 0.002                                              |
| Folic acid                                           | C <sub>19</sub> H <sub>19</sub> N <sub>7</sub> O <sub>6</sub>        | 0.002                                              |
| 2 mercapto ethane sulfonic acid                      | C <sub>2</sub> H <sub>6</sub> O <sub>3</sub> S <sub>2</sub>          | 0.02                                               |
| <b>Trace element solution</b>                        |                                                                      | <b>100x</b>                                        |
| Nitrilotriacetic acid                                | C <sub>6</sub> H <sub>9</sub> NO <sub>6</sub>                        | 2.00                                               |
| Mangan sulfate                                       | MnSO <sub>4</sub>                                                    | 1.00                                               |
| Ammonium iron sulfate                                | NH <sub>4</sub> Fe(SO <sub>4</sub> ) <sub>2</sub>                    | 0.80                                               |
| Cobalt chloride                                      | CoCl <sub>2</sub>                                                    | 0.20                                               |
| Zinc sulfate                                         | ZnSO <sub>4</sub>                                                    | 0.20                                               |
| Copper chloride                                      | CuCl <sub>2</sub>                                                    | 0.02                                               |
| Nickel chloride                                      | NiCl <sub>2</sub>                                                    | 0.02                                               |
| Sodium molybdate                                     | Na <sub>2</sub> MoO <sub>4</sub>                                     | 0.02                                               |
| Sodium selenate                                      | Na <sub>2</sub> SeO <sub>4</sub>                                     | 0.02                                               |
| Sodium wolframate                                    | Na <sub>2</sub> WO <sub>4</sub>                                      | 0.02                                               |
|                                                      |                                                                      | <b>Medium concentration</b>                        |
| <b>Yeast extract</b>                                 |                                                                      | 1.0 g L <sup>-1</sup>                              |
| <b>Cysteine hydrochloride</b> <sup>a)</sup>          | C <sub>3</sub> H <sub>7</sub> NO <sub>2</sub> S HCl                  | 0.4 g L <sup>-1</sup>                              |
| <b>Morpholino ethane sulfonic acid</b> <sup>b)</sup> | C <sub>6</sub> H <sub>13</sub> NO <sub>4</sub> S                     | 15.0 g L <sup>-1</sup>                             |

a) not used for heterotrophic preculture in anaerobic shaken bottles

b) only used for heterotrophic preculture in anaerobic shaken bottles

**Table S2:** Selected process performance data of the mixotrophic batch processes with 16.4 g L<sup>-1</sup> D-fructose and the heterotrophic batch process with 14.4 g L<sup>-1</sup> L-arabinose with *C. autoethanogenum* in stirred-tank bioreactors with continuous gassing (390 mbar N<sub>2</sub>, 300 mbar CO, 220 mbar H<sub>2</sub>, and 90 mbar CO<sub>2</sub>). (F<sub>gas</sub> = 5 NL h<sup>-1</sup>, 37°C, pH 6.0, and P V<sup>-1</sup> = 15.1 W L<sup>-1</sup>).

|                                                             | D-Fructose<br>mixotroph | L-Arabinose<br>heterotroph |
|-------------------------------------------------------------|-------------------------|----------------------------|
| C <sub>initial</sub> , g L <sup>-1</sup>                    | 16.4                    | 14.4                       |
| μ <sub>max</sub> , g L <sup>-1</sup>                        | 0.33                    | 0.18                       |
| CDW <sub>max</sub> , g L <sup>-1</sup>                      | 0.93                    | 1.89                       |
| C <sub>Acetate,final</sub> , g L <sup>-1</sup>              | 2.88                    | 8.36                       |
| C <sub>Ethanol,final</sub> , g L <sup>-1</sup>              | 4.44                    | 0.31                       |
| C <sub>D-2,3-butanediol, final</sub> , g L <sup>-1</sup>    | 0.12                    | 0.13                       |
| C <sub>meso 2,3-butanediol, final</sub> , g L <sup>-1</sup> | --                      | -                          |
| Ratio <sub>Alcohol:Acetate</sub> , g g <sup>-1</sup>        | 1.20                    | 0.05                       |
| Carbon in medium, mmol C L <sup>-1</sup>                    | 9.94                    | 9.94                       |
| Carbon in biomass, mmol C L <sup>-1</sup>                   | 29.33                   | 59.69                      |
| Carbon in product, mmol C L <sup>-1</sup>                   | 311.46                  | 345.29                     |
| CO consumption, mmol C L <sup>-1</sup>                      | 213.46                  | -                          |
| CO <sub>2</sub> production, mmol C L <sup>-1</sup>          | 327.87                  | -                          |
| CO consumption <sub>max</sub> , mmol L h <sup>-1</sup>      | 13.58                   | -                          |
| C-balance (recovery), %                                     | 98.74                   | 90.57                      |

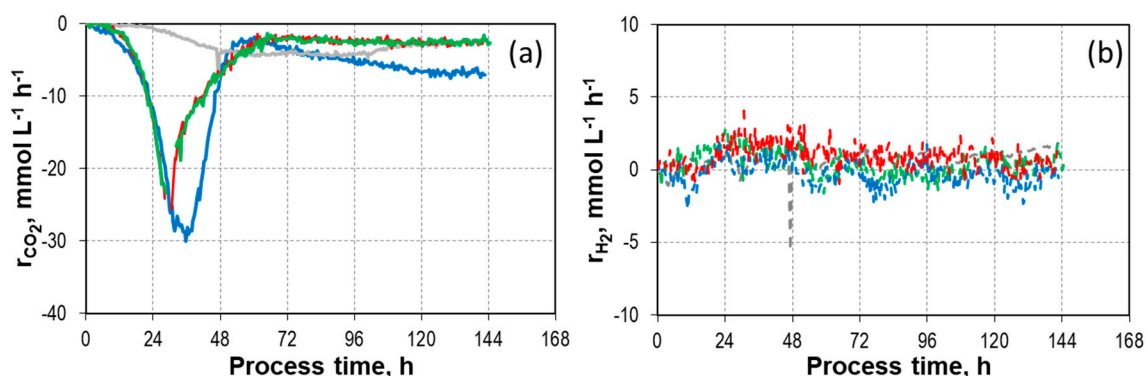

**Figure S1:** (a) CO<sub>2</sub> formation rate and (b) H<sub>2</sub> uptake rate of mixotrophic batch processes with varying initial D-xylose concentrations (♦ 10.3 g L<sup>-1</sup>, ♦ 13.7 g L<sup>-1</sup>, and ♦ 19.3 g L<sup>-1</sup>) with *C. autoethanogenum* in stirred-tank bioreactors with continuous gassing (390 mbar N<sub>2</sub>, 300 mbar CO, 220 mbar H<sub>2</sub>, and 90 mbar CO<sub>2</sub>) compared to the autotrophic reference batch process (grey line). (F<sub>gas</sub> = 5 NL h<sup>-1</sup>, 37°C, pH 6.0, and P V<sup>-1</sup> = 15.1 W L<sup>-1</sup>).

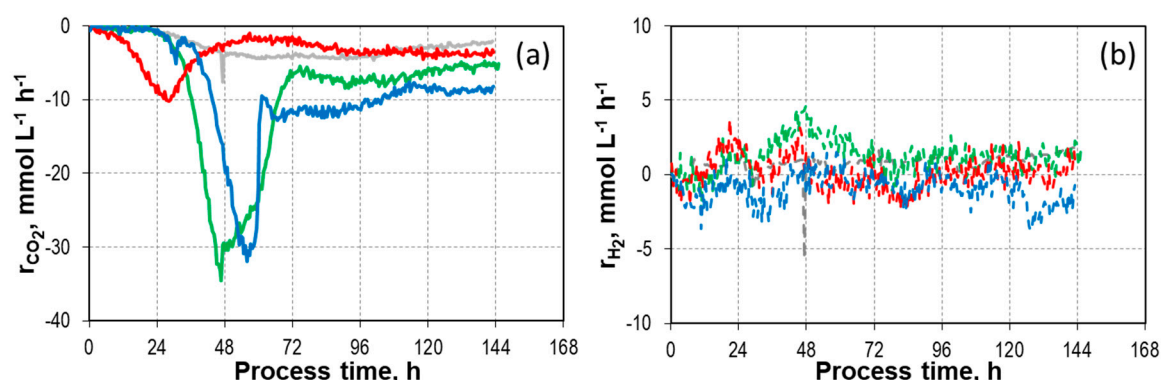

**Figure S2:** (a) CO<sub>2</sub> formation rate and (b) H<sub>2</sub> uptake rate with varying initial L-arabinose concentrations (■ 9.8 g L<sup>-1</sup>, ■ 14.2/14.7 g L<sup>-1</sup>, and ■ 18.8 g L<sup>-1</sup>) with *C. autoethanogenum* in stirred-tank bioreactors with continuous gassing (390 mbar N<sub>2</sub>, 300 mbar CO, 220 mbar H<sub>2</sub>, and 90 mbar CO<sub>2</sub>) compared to the autotrophic reference batch process (grey line). ( $F_{\text{gas}} = 5 \text{ NL h}^{-1}$ , 37°C, pH 6.0, and  $P \text{ V}^{-1} = 15.1 \text{ W L}^{-1}$ ).

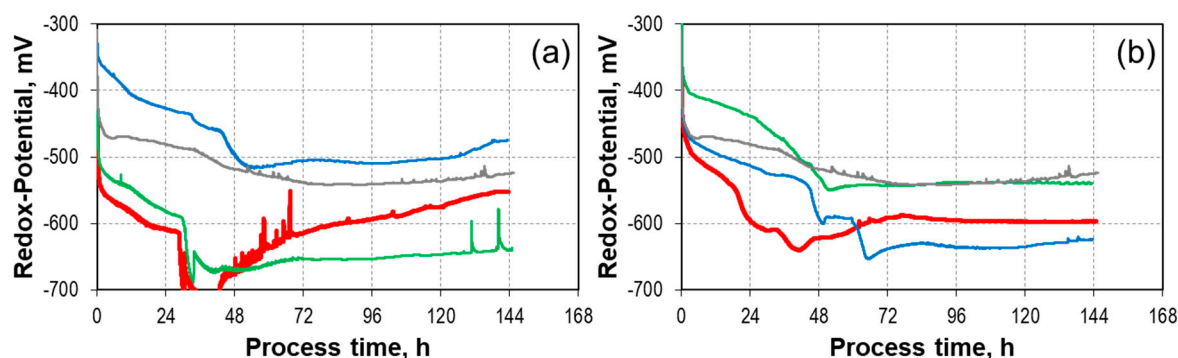

**Figure S3:** Redox-potential of mixotrophic batch processes (a) with varying initial D-xylose concentrations (◆ 10.3 g L<sup>-1</sup>, ◆ 13.7 g L<sup>-1</sup>, and ◆ 19.3 g L<sup>-1</sup>) and (b) with varying initial L-arabinose concentrations (■ 9.8 g L<sup>-1</sup>, ■ 14.2/14.7 g L<sup>-1</sup>, and ■ 18.8 g L<sup>-1</sup>) with *C. autoethanogenum* in stirred-tank bioreactors with continuous gassing (390 mbar N<sub>2</sub>, 300 mbar CO, 220 mbar H<sub>2</sub>, and 90 mbar CO<sub>2</sub>) compared to the autotrophic reference batch process (grey line). ( $F_{\text{gas}} = 5 \text{ NL h}^{-1}$ , 37°C, pH 6.0, and  $P \text{ V}^{-1} = 15.1 \text{ W L}^{-1}$ ).

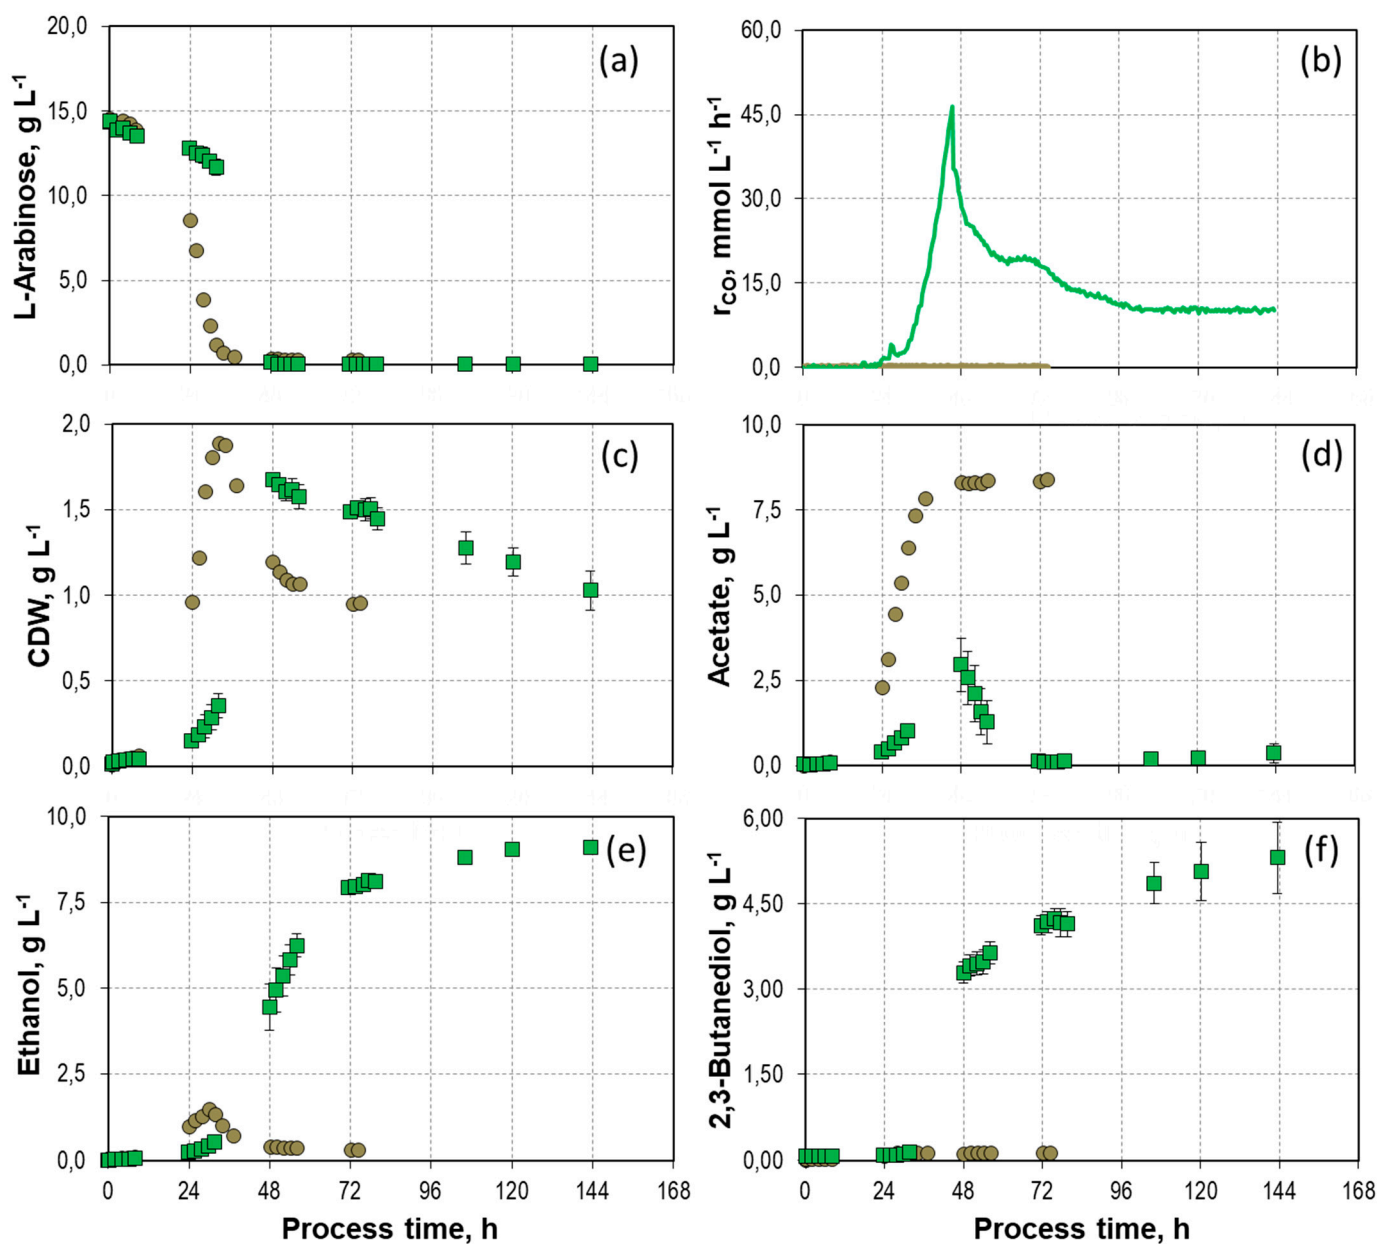

**Figure S4:** Process performance of a heterotrophic batch process with 14.4 g L<sup>-1</sup> L-arabinose (●) compared to a mixotrophic batch process with 14.2/14.7 g L<sup>-1</sup> L-arabinose (■) with *C. autoethanogenum* in stirred-tank bioreactors with continuous gassing (390 mbar N<sub>2</sub>, 300 mbar CO, 220 mbar H<sub>2</sub>, and 90 mbar CO<sub>2</sub>; F<sub>gas</sub> = 5 NL h<sup>-1</sup>, 37°C, pH 6.0, and P V<sup>-1</sup> = 15.1 W L<sup>-1</sup>). The error bars indicate the minimum and maximum values of two individual mixotrophic processes with 14.26 g L<sup>-1</sup> and 14.70 g L<sup>-1</sup>.
